# Supplementary material for: The Prognostic Value of Pretreatment Plasma Fibrinogen in Urological Cancers: A Systematic Review and Meta-analysis
Source: PubMed Central journal article supplement — J Cancer. 2019 Jan 1;10(2):479–87. doi: 10.7150/jca.26989 (PMC6360290; doi:10.7150/jca.26989), 2019-01-01
Supplement: jcav10p0479s1.pdf [file jcav10p0479s1.pdf]

## Supplementary file 1

### MOOSE Checklist

#### The prognostic value of pretreatment plasma fibrinogen in urological cancers: a systematic review and meta-analysis

Haifeng Song, Guanyu Kuang, Binglei Ma, Zhenan Zhang, Jie Jin, Qian Zhang

Department of Urology, Peking University First Hospital and Institute of Urology, Peking University, National Research Center for Genitourinary Oncology, Beijing 100034, China.

#### Corresponding Author :

Qian Zhang M.D.

E-mail : zhangqian@bjmu.edu.cn

Phone : +8613910970928

Jie Jin M.D.

E-mail : jinjie@vip.163.com

Phone : +8613701238632

Department of Urology, Peking University First Hospital and Institute of Urology, Peking University, Research Center for Genitourinary Oncology, 8 Xishiku Street, Xicheng District, Beijing 100034, China

| Criteria                                           | Brief description of how the criteria were handled in the meta-analysis                                                                                                                                                                                                                 |
|----------------------------------------------------|-----------------------------------------------------------------------------------------------------------------------------------------------------------------------------------------------------------------------------------------------------------------------------------------|
| <b>Reporting of background should include</b>      |                                                                                                                                                                                                                                                                                         |
| √ Problem definition                               | Growing evidence suggests pretreatment fibrinogen can serve as a prognostic marker in various malignancies. However, the prognostic role of plasma fibrinogen in urological cancers remains to be evaluated quantitatively because of the contradictory results from different studies. |
| √ Hypothesis statement                             | Elevated pretreatment plasma fibrinogen can predict worse survival outcomes in urological cancers.                                                                                                                                                                                      |
| √ Description of study outcomes                    | overall survival and cancer-specific survival                                                                                                                                                                                                                                           |
| √ Type of exposure or intervention used            | Pretreatment plasma fibrinogen                                                                                                                                                                                                                                                          |
| √ Type of study designs used                       | Cohort studies                                                                                                                                                                                                                                                                          |
| √ Study population                                 | No restriction.                                                                                                                                                                                                                                                                         |
| <b>Reporting of search strategy should include</b> |                                                                                                                                                                                                                                                                                         |
| √ Qualifications of searchers                      | The two investigators Haifeng Song and Guanyu Kuang are trained in systematic methods of literature searching during their doctor's studies.                                                                                                                                            |
| √ Search strategy, including time                  | The detailed search strategy is shown in the supplement.                                                                                                                                                                                                                                |

|                                            |                                                                                                                                            |                                                                                                                                                                                                                                                                                                                                                                                                    |
|--------------------------------------------|--------------------------------------------------------------------------------------------------------------------------------------------|----------------------------------------------------------------------------------------------------------------------------------------------------------------------------------------------------------------------------------------------------------------------------------------------------------------------------------------------------------------------------------------------------|
|                                            | period included in the synthesis and keywords                                                                                              |                                                                                                                                                                                                                                                                                                                                                                                                    |
| √                                          | Databases and registries searched                                                                                                          | PubMed and EMBASE                                                                                                                                                                                                                                                                                                                                                                                  |
| √                                          | Search software used, name and version, including special features                                                                         | We did not employ a search software. EndNote was used to merge retrieved citations and eliminate duplications                                                                                                                                                                                                                                                                                      |
| √                                          | Use of hand searching                                                                                                                      | We hand-searched bibliographies of retrieved papers for additional references,                                                                                                                                                                                                                                                                                                                     |
| √                                          | List of citations located and those excluded, including justifications                                                                     | Details of the literature search process are outlined in the flow chart. The citation list is available upon request                                                                                                                                                                                                                                                                               |
| √                                          | Method of addressing articles published in languages other than English                                                                    | We only searched for papers in English.                                                                                                                                                                                                                                                                                                                                                            |
| √                                          | Method of handling abstracts and unpublished studies                                                                                       | We included proceedings papers and assessed them for eligibility according to our inclusion and exclusion criteria.                                                                                                                                                                                                                                                                                |
| √                                          | Description of any contact with authors                                                                                                    | All data we need was available in the full-text original article, so the authors were not contacted.                                                                                                                                                                                                                                                                                               |
| <b>Reporting of methods should include</b> |                                                                                                                                            |                                                                                                                                                                                                                                                                                                                                                                                                    |
| √                                          | Description of relevance or appropriateness of studies assembled for assessing the hypothesis to be tested                                 | Detailed inclusion and exclusion criteria were described in the methods section.                                                                                                                                                                                                                                                                                                                   |
| √                                          | Rationale for the selection and coding of data                                                                                             | Two reviewers independently extracted data from all eligible studies using a predesigned data-abstraction sheet. Data extracted from studies included the name of the first author, year of publication, country, tumor site, sample size, age, gender, cut-off value, follow-up duration, outcome measures (OS, CSS, HRs, 95%CI) and survival analysis (univariate/multivariate)                  |
| √                                          | Assessment of confounding                                                                                                                  | Not applicable                                                                                                                                                                                                                                                                                                                                                                                     |
| √                                          | Assessment of study quality, including blinding of quality assessors; stratification or regression on possible predictors of study results | The quality of studies was assessed according to the "Newcastle-Ottawa Scale (NOS)" for cohort studies. Studies with more than 5 stars were deemed as being of good quality. Quality assessment were applied independently by two investigators (Haifeng Song and Guanyu Kuang), disagreements were solved by the intervention of a third reviewer (Zhenan Zhang) and the discussion in the group. |
| √                                          | Assessment of heterogeneity                                                                                                                | Cochran's Q-test and Higgins $I^2$ statistics( $I^2$ ) were carried out to evaluate the heterogeneity of included studies. Statistical heterogeneity was considered to be existed if $I^2 > 50\%$ or $P < 0.05$ .                                                                                                                                                                                  |
| √                                          | Description of statistical methods in sufficient detail to be replicated                                                                   | Description of methods of meta-analyses, subgroup analyses and assessment of publication bias are detailed in the methods.                                                                                                                                                                                                                                                                         |

|                                                |                                                                   |                                                                                                                                                                                                              |
|------------------------------------------------|-------------------------------------------------------------------|--------------------------------------------------------------------------------------------------------------------------------------------------------------------------------------------------------------|
| √                                              | Provision of appropriate tables and graphics                      | We included 1 flow chart, 1 summary table, 2 forest plot of all studies, 4 forest plot of subgroup analyses, 2 figures of publication bias.                                                                  |
| <b>Reporting of results should include</b>     |                                                                   |                                                                                                                                                                                                              |
| √                                              | Graph summarizing individual study estimates and overall estimate | Figure 2.A and Figure 3.A                                                                                                                                                                                    |
| √                                              | Table giving descriptive information for each study included      | Table 1                                                                                                                                                                                                      |
| √                                              | Results of sensitivity testing                                    | A study using univariate analysis for the calculation of HR was excluded and the final result of meta-analysis had no significant difference. Subgroup analyses by race and cancer type were also performed. |
| √                                              | Indication of statistical uncertainty of findings                 | 95% confidence intervals were presented with all summary estimates                                                                                                                                           |
| <b>Reporting of discussion should include</b>  |                                                                   |                                                                                                                                                                                                              |
| √                                              | Quantitative assessment of bias                                   | No significant publication bias was observed when assessed using Begg's and Egger's tests                                                                                                                    |
| √                                              | Justification for exclusion                                       | Papers were excluded on the basis of exclusion criteria listed. We did not systematically exclude any studies on the basis of language or study population size                                              |
| √                                              | Assessment of quality of included studies                         | Our study was referring to 14 eligible studies of good quality assessed by NOS score system.                                                                                                                 |
| <b>Reporting of conclusions should include</b> |                                                                   |                                                                                                                                                                                                              |
| √                                              | Consideration of alternative explanations for observed results    | Fibrinogen can be endogenously synthesized and secreted by cancer cells. It can also regulate the proliferation and angiogenesis of cancer cells and facilitate tumor metastasis.                            |
| √                                              | Generalization of the conclusions                                 | High level of pretreatment plasma fibrinogen can predict worse overall survival and cancer-specific survival in patients with urological cancers.                                                            |
| √                                              | Guidelines for future research                                    | More clinical studies are needed to further prove this relationship.                                                                                                                                         |
| √                                              | Disclosure of funding source                                      | None                                                                                                                                                                                                         |

## Supplementary file 2

### Search Strategy

#### Pubmed

#1 (((((((((((((((((((Kidney Neoplasms[MeSH Terms]) OR Carcinoma, Renal Cell[MeSH Terms]) OR Kidney Neoplasm) OR Neoplasm, Kidney) OR Neoplasm, Renal) OR Renal Neoplasm) OR Cancer of Kidney) OR Renal Cancer) OR Cancer, Renal) OR Cancer of the Kidney) OR Kidney Cancer) OR Cancer, Kidney) OR Carcinoma, Renal Cell) OR Renal Cell Carcinoma) OR Renal Cell Carcinoma, Papillary) OR Renal Cell Cancer) OR Cancer, Renal Cell) OR Clear Cell Renal Cell Carcinoma) OR kidney carcinoma) OR renal carcinoma)

#2 (((((((Carcinoma, Transitional Cell[MeSH Terms]) OR ((urothelial carcinoma) AND ((upper tract) OR (upper urinary tract)))) OR ((transitional cell carcinoma) AND ((upper tract) OR (upper urinary tract)))) OR ureteral cancer) OR ureter cancer) OR ureter carcinoma) OR ureteral carcinoma) OR ureteral neoplasm) OR Ureteral Neoplasms[MeSH Terms]

#3 ((((((Urinary Bladder Neoplasms[MeSH Terms]) OR bladder cancer) OR bladder tumor) OR bladder carcinoma) OR carcinoma of bladder) OR bladder carcinoma) OR cancer of bladder

#4 (((((((Prostatic Neoplasms[MeSH Terms]) OR prostate cancer) OR prostate tumor) OR prostate carcinoma) OR prostate neoplasm) OR prostatic cancer) OR prostatic carcinoma) OR cancer of prostate) OR carcinoma of prostate

#5 ((((((Urogenital Neoplasms[MeSH Terms]) OR Urologic Neoplasms[MeSH Terms]) OR urologic cancer) OR urological cancer) OR urogenital cancer) OR urologic carcinoma) OR urogenital carcinoma

#6 = #1 OR #2 OR #3 OR #4 OR #5 (((((((((((((((((((Kidney Neoplasms[MeSH Terms]) OR Carcinoma, Renal Cell[MeSH Terms]) OR Kidney Neoplasm) OR Neoplasm, Kidney) OR Neoplasm, Renal) OR Renal Neoplasm) OR Cancer of Kidney) OR Renal Cancer) OR Cancer, Renal) OR Cancer of the Kidney) OR Kidney Cancer) OR Cancer, Kidney) OR Carcinoma, Renal Cell) OR Renal Cell Carcinoma) OR Renal Cell Carcinoma, Papillary) OR Renal Cell Cancer) OR Cancer, Renal Cell) OR Clear Cell Renal Cell Carcinoma) OR kidney carcinoma) OR renal carcinoma))) OR (((((((Carcinoma, Transitional Cell[MeSH Terms]) OR ((urothelial carcinoma) AND ((upper tract) OR (upper urinary tract)))) OR ((transitional cell carcinoma) AND ((upper tract) OR (upper urinary tract)))) OR ureteral cancer) OR ureter cancer) OR ureter carcinoma) OR ureteral carcinoma) OR ureteral neoplasm) OR Ureteral Neoplasms[MeSH Terms])) OR ((((((Urinary Bladder Neoplasms[MeSH Terms]) OR bladder cancer) OR bladder tumor) OR bladder carcinoma) OR carcinoma of bladder) OR bladder carcinoma) OR cancer of bladder)) OR (((((((Prostatic Neoplasms[MeSH Terms]) OR prostate cancer) OR prostate tumor) OR prostate carcinoma) OR prostate neoplasm) OR prostatic cancer) OR prostatic carcinoma) OR cancer of prostate) OR carcinoma of prostate))) OR ((((((Urogenital Neoplasms[MeSH Terms]) OR Urologic Neoplasms[MeSH Terms]) OR urologic cancer) OR urological cancer) OR urogenital cancer) OR urologic carcinoma) OR urogenital carcinoma)

#7 fibrinogen

#8 = #6 AND #7 (((((((((((((((((((((((Kidney Neoplasms[MeSH Terms]) OR Carcinoma, Renal Cell[MeSH Terms]) OR Kidney Neoplasm) OR Neoplasm, Kidney) OR Neoplasm, Renal) OR Renal Neoplasm) OR Cancer of Kidney) OR Renal Cancer) OR Cancer, Renal) OR Cancer of the Kidney) OR Kidney Cancer) OR Cancer, Kidney) OR Carcinoma, Renal Cell) OR Renal Cell Carcinoma) OR Renal Cell Carcinoma, Papillary) OR Renal Cell Cancer) OR Cancer, Renal Cell) OR Clear Cell Renal Cell Carcinoma) OR kidney carcinoma) OR renal carcinoma))) OR (((((((Carcinoma, Transitional Cell[MeSH Terms]) OR ((urothelial carcinoma) AND ((upper tract) OR (upper urinary tract)))) OR ((transitional cell carcinoma) AND ((upper tract) OR (upper urinary tract)))) OR ureteral cancer) OR ureter cancer) OR ureter carcinoma) OR ureteral carcinoma) OR ureteral neoplasm) OR Ureteral Neoplasms[MeSH Terms])) OR (((((((Urinary Bladder Neoplasms[MeSH Terms]) OR bladder cancer) OR bladder tumor) OR bladder carcinoma) OR carcinoma of bladder) OR bladder carcinoma) OR cancer of bladder)) OR (((((((Prostatic Neoplasms[MeSH Terms]) OR prostate cancer) OR prostate tumor) OR prostate carcinoma) OR prostate neoplasm) OR prostatic cancer) OR prostatic carcinoma) OR cancer of prostate) OR carcinoma of prostate))) OR (((((((Urogenital Neoplasms[MeSH Terms]) OR Urologic Neoplasms[MeSH Terms]) OR urologic cancer) OR urological cancer) OR urogenital cancer) OR urologic carcinoma) OR urogenital carcinoma) AND (fibrinogen)

Filter: Human;

### Embase

#1 'kidney cancer'/exp OR 'kidney carcinoma'/exp OR 'renal cancer' OR 'renal cell carcinoma' OR 'renal carcinoma'  
#2 'ureter tumor'/exp OR 'ureter cancer'/exp OR 'ureteral cancer' OR 'ureter cancer' OR 'ureter carcinoma' OR 'ureteral carcinoma' OR 'ureter tumor' OR ('urothelial carcinoma' OR 'transitional cell carcinoma' AND ('upper tract' OR 'upper urinary tract'))  
#3 'bladder cancer'/exp OR 'bladder cancer' OR 'bladder carcinoma' OR 'bladder tumor'  
#4 'prostate cancer'/exp OR 'prostate carcinoma'/exp OR 'prostate cancer' OR 'prostate tumor'  
#5 'urologic' OR 'urological' OR 'urinary' OR 'urogenital' AND ('neoplasm'/exp OR 'carcinoma'/exp OR 'cancer' OR 'carcinoma' OR 'tumor') OR 'urinary tract cancer'/exp  
#6 'fibrinogen'/exp

#7 = #6 AND (#1 OR #2 OR #3 OR #4 OR #5) 'fibrinogen'/exp AND ('kidney cancer'/exp OR 'kidney carcinoma'/exp OR 'renal cancer' OR 'renal cell carcinoma' OR 'renal carcinoma' OR 'ureter tumor'/exp OR 'ureter cancer'/exp OR 'ureteral cancer' OR 'ureter cancer' OR 'ureter carcinoma' OR 'ureteral carcinoma' OR 'ureter tumor' OR ('urothelial carcinoma' OR 'transitional cell carcinoma' AND ('upper tract' OR 'upper urinary tract')) OR 'bladder cancer'/exp OR 'bladder cancer' OR 'bladder carcinoma' OR 'bladder tumor' OR 'prostate cancer'/exp OR 'prostate carcinoma'/exp OR 'prostate cancer' OR 'prostate tumor' OR ('urologic' OR 'urological' OR 'urinary' OR 'urogenital' AND ('neoplasm'/exp OR 'carcinoma'/exp OR 'cancer' OR 'carcinoma' OR 'tumor')) OR 'urinary tract cancer'/exp) AND [humans]/lim AND [embase]/lim
